# Supplementary material for: Computational Studies of a Mechanism for Binding and Drug Resistance in the Wild Type and Four Mutations of HIV-1 Protease with a GRL-0519 Inhibitor
Source: PubMed Central journal article supplement (PMC4926353; doi:10.3390/ijms17060819), 2016-05-27
Supplement: ijms-17-00819-s001.pdf [file ijms-17-00819-s001.pdf]

## Supplementary Materials: Computational Studies of a Mechanism for Binding and Drug Resistance in the Wild Type and Four Mutations of HIV-1 Protease with a GRL-0519 Inhibitor

Guodong Hu, Aijing Ma, Xianghua Dou, Liling Zhao and Jihua Wang

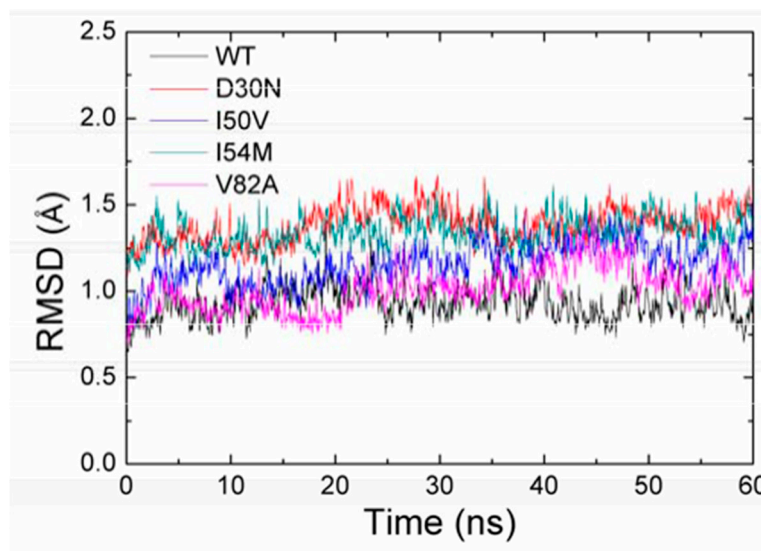

**Figure S1.** The root-mean-square deviations (RMSDs) of the back bone atoms relative to the crystal structure of the WT as a function of MD time.

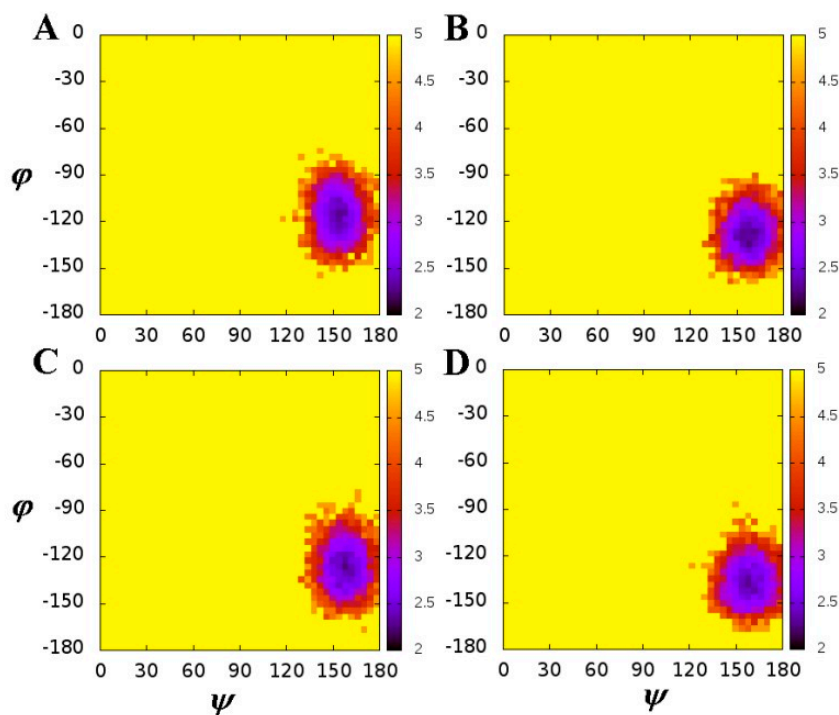

**Figure S2.** Contour maps of the free energy as a function of the backbone angles  $\psi$  and  $\phi$  for residue 30 in the WT (A,B) and D30N (C,D). (A) and (C) are in chain A, and (B) and (D) in chain B.

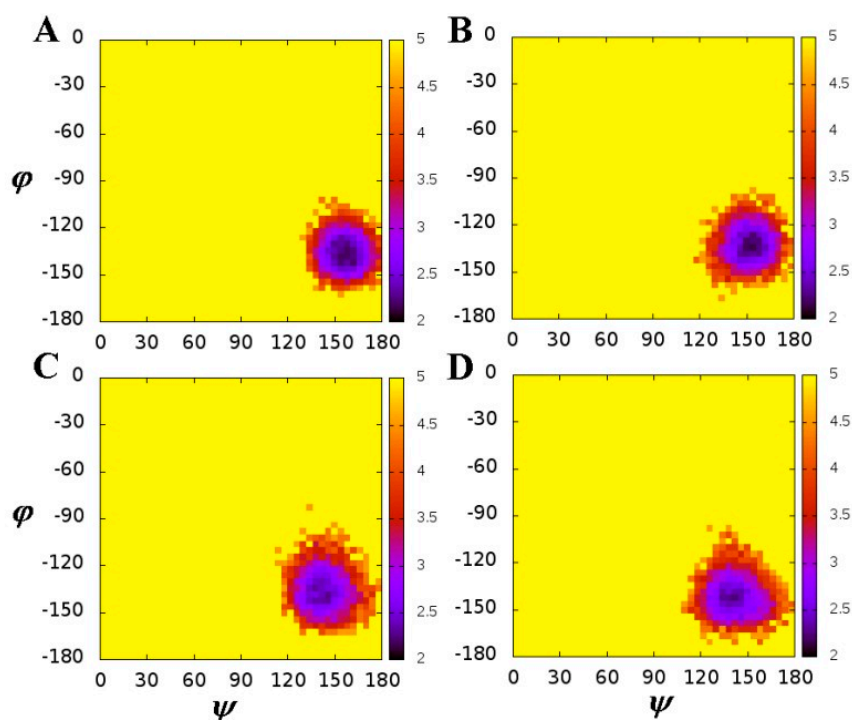

**Figure S3.** Contour maps of the free energy as a function of the backbone angles  $\psi$  and  $\phi$  for residue 54 in the WT (A,B) and I54M (C,D). (A) and (C) are in chain A, and (B) and (D) in chain B.

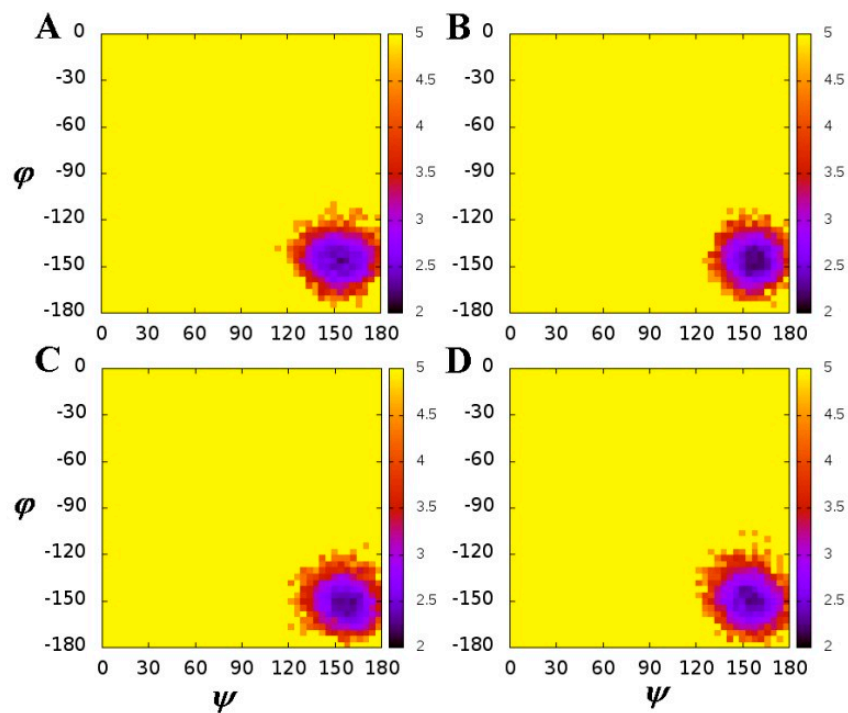

**Figure S4.** Contour maps of the free energy as a function of the backbone angles  $\psi$  and  $\phi$  for residue 82 in the WT (A,B) and V82A(C,D). (A) and (C) are in chain A, and (B) and (D) in chain B.

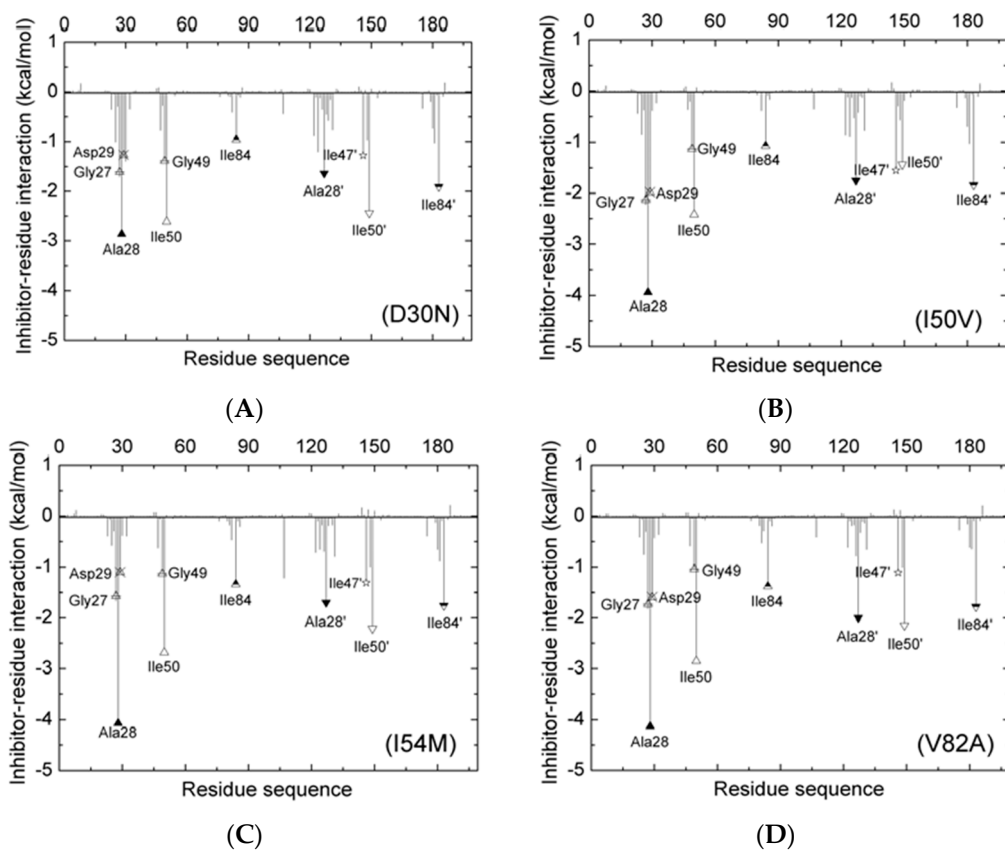

**Figure S5.** (A–D) Decomposition of  $\Delta G_{\text{inhibitor-residue}}$  on a per-residue basis for D30N, I50V, I54M, and V82A.
